# Supplementary material
Source: PubMed Central journal article supplement (PMC7061984)
Supplement: rstb20190346supp1.pdf [file rstb20190346supp1.pdf]

## **SUPPLEMENTARY MATERIAL**

### **Contents:**

*Supplementary Table 1. Oligonucleotides used in this study.*

*Supplementary Table 2. Human genes regulated by miRNA-20.*

*Supplementary Figure 1. Related to Figure 2.*

*Supplementary Figure 2. Related to Figure 3.*

*Supplementary Figure 3. Related to Figure 3.*

*Supplementary Figure 4. Related to Figure 3.*

*Supplementary References*

**Supplemental Table 1:** Oligonucleotides used in this study.

| <b>Primer name</b>   | <b>Sequence (5' to 3')</b> |
|----------------------|----------------------------|
| <b>GAPDH_Fw</b>      | TGCACCACCAACTGCTTAGC       |
| <b>GAPDH_Rv</b>      | GGCATGGACTGTGGTCATGAG      |
| <b>FANCA-qPCR_Fw</b> | TTGCTGCCTTTGGGTCTTCC       |
| <b>FANCA-qPCR_Rv</b> | CAGCGCCTCAGAAGAGAGGACG     |
| <b>FANCC-qPCR_Fw</b> | GCTGGCACTCTTTCAGTTGAC      |
| <b>FANCC-qPCR_Rv</b> | CGTCTTCATGGAAGTAGGAGAGA    |
| <b>miR-20-qPCR</b>   | TAAAGTGCTTATAGTGCAGGTAGAAA |
| <b>Let-7-qPCR</b>    | TGAGGTAGTAGGTTGTATAGTAAA   |
| <b>SNORD44_qPCR</b>  | GCAAATGCTGACTGAACATGAA     |

**Supplemental Table 2:** Human genes regulated by miRNA-20. Column 1 indicates if the gene was experimentally validated (blue, [1]) or identified *in silico* in this study (green). Columns 2 and 3 show the maximum effect detected for each gene in K562 and HeLa cells, using data from [2].

| <b>Trompeter et al. PLOS One 2011</b> | <b>K562--Maximum Effect (95% Credible Interval)</b> | <b>HeLa--Maximum Effect Estimate</b> |
|---------------------------------------|-----------------------------------------------------|--------------------------------------|
| CCND1                                 | 1,9                                                 | 1,7                                  |
| CCND2                                 | 2                                                   | 1,1                                  |
| CDKN1A                                | 2,3                                                 | 1,5                                  |
| E2F1                                  | 1                                                   | 3,8                                  |
| PTEN                                  | 3                                                   | 4,6                                  |
| RBL1                                  | 1                                                   | 2                                    |
| RBL2                                  | 4,2                                                 | 2,2                                  |
| (experimentally validated!)           |                                                     |                                      |
| <b>Found by 3 softwares</b>           |                                                     |                                      |
| CFL2                                  | 4,3                                                 | 1,3                                  |
| DYNC1LI2                              | 1,7                                                 | 3,5                                  |
| ENPP5                                 | 0,9                                                 | 3,1                                  |
| EPHA4                                 | -0,1                                                | 2,8                                  |
| EZH1                                  | 3                                                   | 2,7                                  |
| FBXL5                                 | 4,3                                                 | 1,6                                  |
| GPR6                                  | 5,8                                                 | 3,5                                  |
| MYT1L                                 | 1,1                                                 | 2,6                                  |
| PKD2                                  | 2                                                   | 2,6                                  |
| PLEKHA3                               | 0,5                                                 | 2,9                                  |
| RRAGD                                 | 4                                                   | 2,1                                  |
| RUFY2                                 | 1,7                                                 | 6,2                                  |
| VLDLR                                 | 2,7                                                 | 1,8                                  |
| ZNF800                                | 2,1                                                 | 3,9                                  |
| ZNFX1                                 | 5,6                                                 | 4                                    |

**Supplemental Figure 1 (Related to Figure 2): Mir-20a binding sites in human RC-L1s.** The table describe the binding sites for miR-20a identified in the consensus sequence of human active L1s, after sequence analyses using the rna22 online tool (<https://cm.jefferson.edu/rna22/>). From left to right, columns 1 and 2 indicate the name of the miRNA and gene, respectively; column 3, indicates the leftmost position of the predicted binding site, with respect to L1.3 [[3], accession number L19088.1]; column 4, indicates the folding energy (in Kcal/mol); column 5, contains the alignment of the miRNA and gene; and column 6, indicates the p value of the findings.

| miR name    | Transcript | Leftmost position of predicted target site | Folding energy (Kcal/mol) | Heteroduplex alignment                                                        | p value |
|-------------|------------|--------------------------------------------|---------------------------|-------------------------------------------------------------------------------|---------|
| hsa-miR-20a | L1Hs       | 607                                        | -10.00                    | GTCCTGT-CTG--ACAGCITTG<br>    :   : :     :<br>GATGGACGTGATATTCGTGAAAT        | 5.68E-3 |
| hsa-miR-20a | L1Hs       | 5910                                       | -10.10                    | ATACCTAATGCTAGATGACACATTA<br>    :              <br>GATGGA-CGTGATATTC-GTGAAAT | 3.74E-1 |

**Supplemental Figure 2 (Related to Figure 3): siRNA/L1-retrotransposition reporter assay controls.** Shown are representative retrotransposition assays conducted in HeLa cells using plasmid JJ101/L1.3 in the presence of the indicated siRNA. The graph at the bottom plots the relative retrotransposition rate of the above assays, where cells co-transfected with a non-targeting control siRNA (NTC) were assigned 1 for comparison. The SD of the assay is indicated (duplicate).

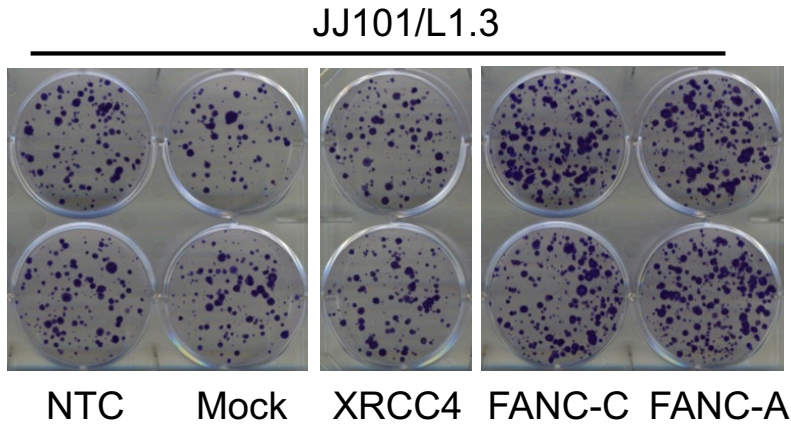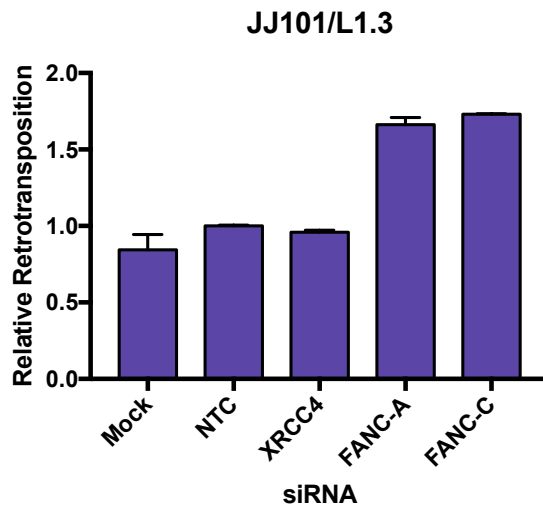

**Supplemental Figure 3 (Related to Figure 3): Kinetic of L1 retrotransposition using *mblastI*-tagged RC-L1s.** The top panel shows a scheme of the assay, where circles indicate days. Below are shown representative retrotransposition results in HeLa cells using plasmid JJ101/L1.3. Indicated in the top is the day where blasticidin selection was started. NO BLAST, no antibiotic was used, as a control. The graph in the bottom shows the number of blasticidin resistant foci (triplicate) generated upon JJ101/L1.3 transfection in HeLa cells, and starting blasticidin selection in the indicated day.

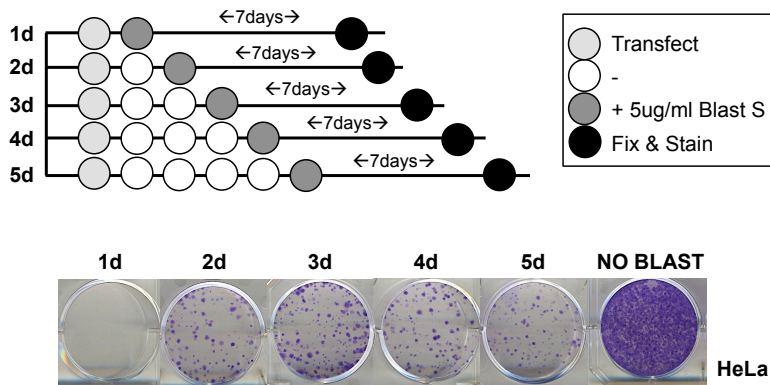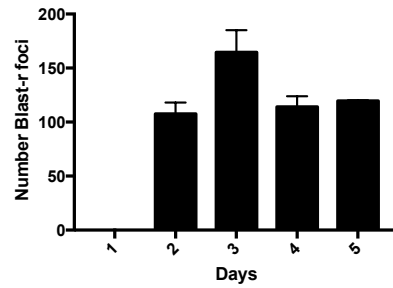

**Supplemental Figure 4 (Related to Figure 3): siRNA/L1-retrotransposition reporter assays in HeLa (left side) and HCT116 (right side) cells.** The graphs at the top show results from mitomycin C (MMC) sensitivity assays upon siRNA treatment (for FANC-A and FANC-C). The graph plots the percentage of cell viability detected upon treatment of siRNA transfected cells with 0 (black bars, assigned 100%), 50 (dark grey) and 100 nM MMC (light grey bars). Below are shown representative retrotransposition (JJ101/L1.3) and toxicity/clonability (pCDNA6) results in HeLa (left) and HCT116 (left) cells transfected with the indicated FANC siRNA (A or C) or with a NT control (siNT), used as an internal negative control. The graphs at the bottom plot the retrotransposition rate upon siRNA treatment (FANC-A and FANC-C, dark and light grey bars, respectively) relative to siNT. The SD of the assay is indicated. Unpaired two-sided t-test, \*P<0.05.

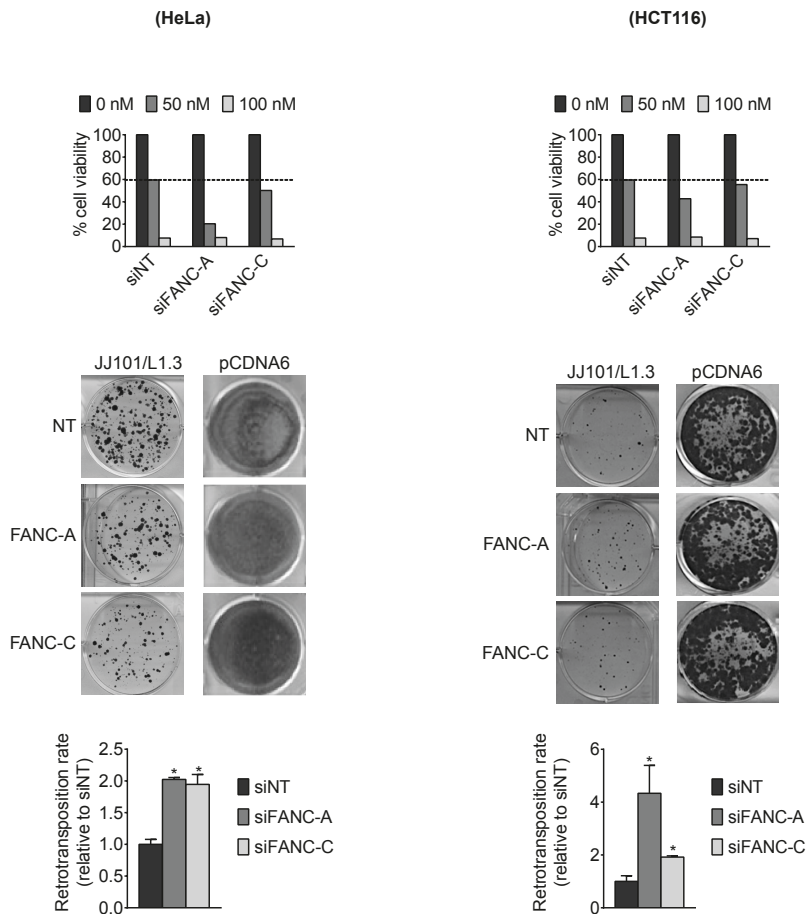

### ***Supplementary References***

- 1 Trompeter, H. I., Abbad, H., Iwaniuk, K. M., Hafner, M., Renwick, N., Tuschl, T., Schira, J., Muller, H. W., Wernet, P. 2011 MicroRNAs MiR-17, MiR-20a, and MiR-106b act in concert to modulate E2F activity on cell cycle arrest during neuronal lineage differentiation of USSC. *PloS one*. **6**, e16138. (10.1371/journal.pone.0016138)
- 2 Liu, N., Lee, C. H., Swigut, T., Grow, E., Gu, B., Bassik, M. C., Wysocka, J. 2018 Selective silencing of euchromatic L1s revealed by genome-wide screens for L1 regulators. *Nature*. **553**, 228-232. (10.1038/nature25179)
- 3 Sassaman, D. M., Dombroski, B. A., Moran, J. V., Kimberland, M. L., Naas, T. P., DeBerardinis, R. J., Gabriel, A., Swergold, G. D., Kazazian, H. H., Jr. 1997 Many human L1 elements are capable of retrotransposition. *Nat Genet*. **16**, 37-43. (10.1038/ng0597-37)
